# Supplementary material for: Evaluation of sample preparation methods for polymer digestion and trace elements determination by ICPMS and ICPOES
Source: Royal Society of Chemistry journal article supplement (doi:10.1039/c1ja10050e), 2011-01-01

## SUPPLEMENTARY INFORMATION:

### S1. Steps of Microwave-induced combustion method for polymers digestion

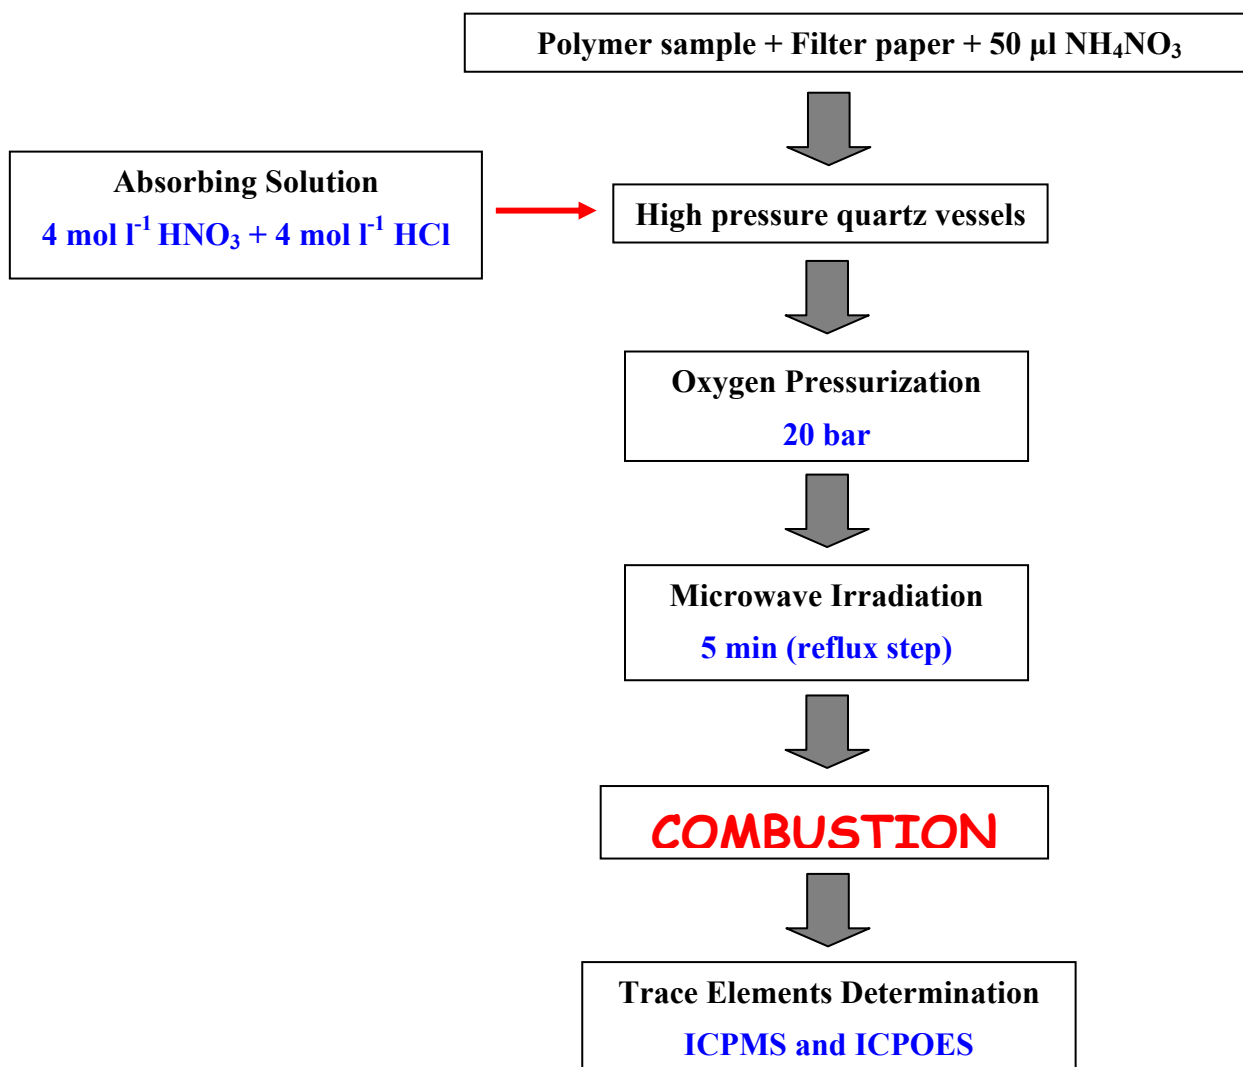

**S2. Polymer sample (e.g., PET green) and sample pressed as pellet for MIC digestion above the quartz holder device.**

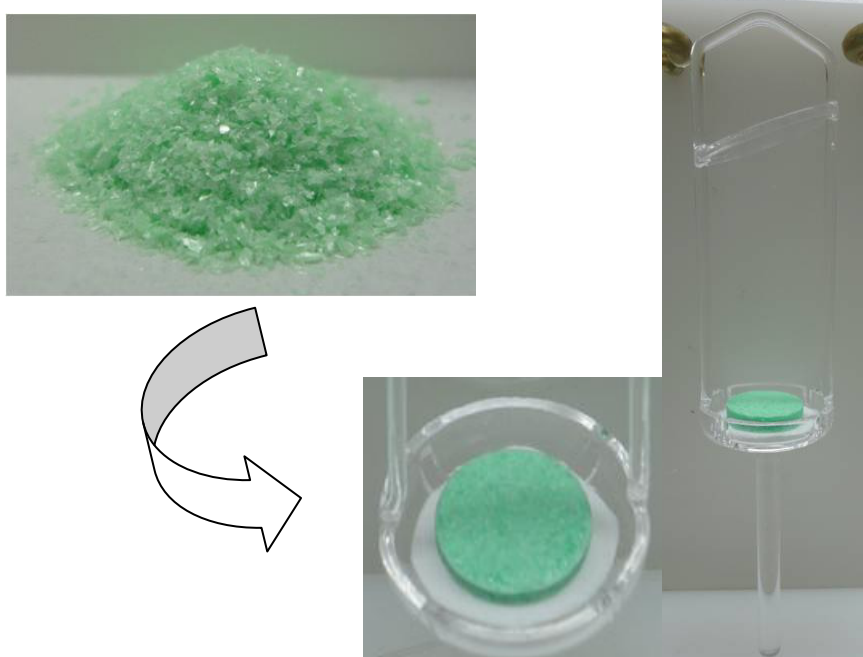

**S3. View of PET combustion using MIC method (500 mg of sample, 25 bar O<sub>2</sub>, 5 s of microwave irradiation, temperature ~ 1400°C).**

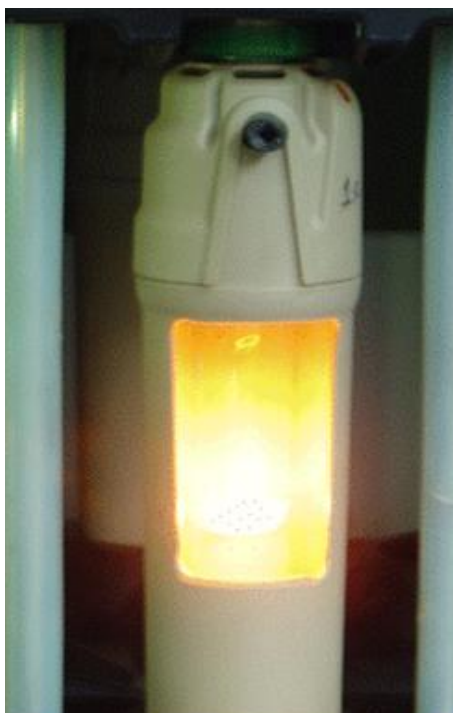

**S4. Digest obtained after microwave-assisted acid digestion (MW-AD) of PS sample (300 mg) using high pressure and temperature (6 ml of concentrated HNO<sub>3</sub> and microwave heating program up to 1000 W for 40 min of digestion).**

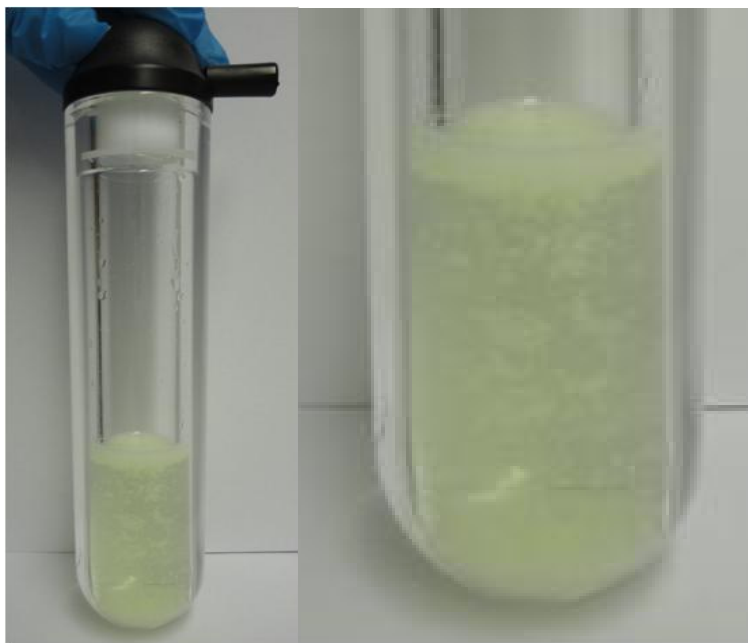

Supplement: c1ja10050e.pdf [file c1ja10050e.pdf]
